# Supplementary material
Source: Research Square preprint supplement (doi:10.21203/rs.3.rs-10286280/v1)
Supplement: Supplementary file 1 [file 8097c23aab8e624a210a9e5b.docx]

**Appendix A. Classification Codebook for Stage 1 FTS Recipient Coding**

This appendix summarizes the classification rules used for the Stage 1 strict-local coding. The rules are conservative by design: where independent local origin, local governance, and donor-facing autonomy cannot be verified, the case is coded outside the strict local/national NGO category or retained for manual review. These definitions should be reproduced in the replication package alongside the country-year workbook.

**Appendix Table A1**

*Actor-Type Classification Rules Used in the Strict-Local Coding*

| **Category** | **Working definition** | **Coding rule for Stage 1** |
| --- | --- | --- |
| Strict local/national NGO | A locally originated, self-governing, non-profit civil-society institution embedded in local civic or community networks, accountable to local constituencies, and independent from international NGO branch or subsidiary control. | Count as strict local/national NGO only when local origin, independent governance, and donor-facing autonomy can be verified or reasonably established from organizational evidence. |
| Broad FTS/local-labeled actor | An actor labeled by FTS, recipient records, or related documentation as local or national, including actors that may be local by registration, name, or country operation. | Use as the broader comparison category. Do not automatically count as strict local unless the ontological criteria are met. |
| Pseudo-local actor | An actor that appears local by registration, name, staffing, or country presence, but whose independent local ownership, governance, donor-facing authority, or autonomous resource-mobilization capacity cannot be verified. | Exclude from strict local; code separately unless independent local governance, ownership, and donor-facing autonomy are verified. |
| International affiliate / country office | A country office, branch, subsidiary, member, or governance-dependent unit of an international NGO, federation, or global aid structure. | Exclude unless independent local governance, fundraising authority, donor-facing autonomy, and independent funding access are clearly documented. |
| UN / multilateral agency | A UN agency, multilateral organization, or multilateral implementing mechanism. | Code as UN/multilateral; exclude from local NGO numerator. |
| International NGO | An NGO headquartered outside the aid-recipient country or operating through an international governance structure. | Code as INGO; exclude from strict local numerator. |
| Pooled fund | A country-based pooled fund, UN-managed pooled fund, or other collective financing mechanism that receives funds before allocating them onward. | Code as pooled fund/intermediary. Do not count as direct local NGO funding unless final recipient allocations are separately traced. |
| Government / public actor | A national, subnational, or public-sector institution, ministry, municipality, or state-linked body. | Code as government/public actor; exclude from local NGO numerator even when nationally based. |
| Red Cross / Red Crescent actor | A national society, IFRC, ICRC, or Red Cross/Red Crescent movement entity. | Code separately because national societies may be locally embedded but are part of a distinct humanitarian movement and legal architecture. |
| Private / contractor actor | A private firm, contractor, consultancy, or for-profit development implementer. | Code separately; exclude from local NGO numerator. |
| Unknown / manual review | A recipient whose organizational status, governance, country office relationship, or local autonomy cannot be verified from available records. | Do not count as strict local until verified. Retain in manual-review notes for Stage 2 tracing. |

*Note. Network membership, advocacy affiliation, faith-based affiliation, or partnership with an international actor does not automatically disqualify an organization from the strict local category. The decisive issue is whether the organization operates as a branch, subsidiary, country office, or governance-dependent affiliate, or whether it retains independent local governance and donor-facing autonomy.*
